# Supplementary material for: Characteristics of the clinicopathology and immune microenvironment of the basal-like phenotype in HR+/HER2-breast cancer
Source: Research Square preprint supplement (doi:10.21203/rs.3.rs-1338624/v1), 2022-02-14
Supplement: Supplementary file 1 [file 1500642090df5b1d7201caf5.docx]

| **Antibodies** | **Company** | **Reference** | **Clone** | **Origin** | **Isotype** | **Antigen Retrieval** | **Dilution** |
| --- | --- | --- | --- | --- | --- | --- | --- |
| EGFR | Abcam, Cambridge, UK | ab52894 | EP38Y | Monoclonal rabbit | IgG | Tris-EDTA pH9.0 | 1:100 |
| CK5/6 | Abcam, Cambridge, UK | ab17133 | D5/16 B4 | Monoclonal mouse | IgG1 | Tris-EDTA pH8.0 | 1:100 |
| p53 | Abcam, Cambridge, UK | ab131442 | - | Polyclone rabbit | IgG | Tris-EDTA pH9.0 | 1:100 |
| CD3 | ZSJQ-BIO, Beijing, CHINA, | ZM-0417 | LN10 | Monoclonal mouse | IgG1 | Tris-EDTA pH8.0 | 1:100 |
| CD8α | ZSJQ-BIO, Beijing, CHINA | TA802079 | OTI3H6 | Monoclonal mouse | IgG1 | Tris-EDTA pH9.0 | 1:800 |
| FOXP3 | Abcam, Cambridge, UK | ab20034 | 236A/E7 | Monoclonal mouse | IgG | Tris-EDTA pH9.0 | 1:400 |
| CXCL13 | ZSJQ-BIO, Beijing, CHINA | ZG-0601 | - | Polyclonal goat | IgG | Tris-EDTA pH9.0 | prediluted |
| CD68 | ZSJQ-BIO, Beijing, CHINA | ZM-0464 | PG-M1 | Monoclonal mouse | IgG3 | Tris-EDTA pH9.0 | 1:800 |
| PD-1 | Cell Signaling Tech, Boston, USA | 86163T | D4W2J | Monoclonal rabbit | IgG | Tris-EDTA pH9.0 | 1:200 |
| PD-L1 | Abcam, Cambridge, UK | ab228462 | SP142 | Monoclonal rabbit | IgG | Tris-EDTA pH9.0 | 1:400 |

Supplementary table 1. Details about antibodies and experiment condition in this study
